# Supplementary material for: Marine cyanolichens from different littoral zones are associated with distinct bacterial communities
Source: PeerJ. 2018 Jul 17;6:e5208. doi: 10.7717/peerj.5208 (PMC6054067; doi:10.7717/peerj.5208)
Supplement: Table S4 — List of the 30 most abundant OTUs for either the marine lichens or the maritime-inland terrestrial lichen group, presented together with their GreenGenes taxonomic identity and the closest relative obtained by blastn analysis. [file peerj-06-5208-s005.xlsx]

## Sheet: Sheet1
Table S4. Closest relatives assessed by blastn of the top marine and terrestrial OTUs associated with the lichen species
OTU ID	Taxonomic assignment from GreenGenes database	Marine (M) Terrestrial (T)	N° seqs marine lichens	N° seqs seawater	N° seqs terrestrial lichens	Closest relative	Accession N°	Identity (%)
OTU_15	k__Bacteria; p__Proteobacteria; c__Gammaproteobacteria	M	3153	4	49	Uncultured prokaryote clone New.CleanUp.ReferenceOTU97870	KT981833.1	97.892
OTU_19	k__Bacteria; p__Proteobacteria; c__Alphaproteobacteria; o__Rhodobacterales; f__Rhodobacteraceae; g__Jannaschia	M	980	2	11	Uncultured prokaryote clone 257910 16S ribosomal RNA gene	KT973212.1	99.005
OTU_60	k__Bacteria; p__Proteobacteria; c__Alphaproteobacteria; o__Rhodobacterales; f__Rhodobacteraceae	M	550	2	8	Uncultured bacterium clone A130 16S ribosomal RNA gene	KJ817481.1	98.507
OTU_21	k__Bacteria; p__Proteobacteria; c__Alphaproteobacteria; o__Sphingomonadales; f__Erythrobacteraceae	M	714	1	14	Altererythrobacter namhicola strain JCM 16345, complete genome	CP016545.1	99.751
OTU_94	k__Bacteria; p__Proteobacteria; c__Alphaproteobacteria; o__Sphingomonadales; f__Erythrobacteraceae	M	407	0	5	Erythrobacter sp. KLE1222 16S ribosomal RNA gene	GU644360.1	99.005
OTU_5	k__Bacteria; p__Bacteroidetes; c__Flavobacteriia; o__Flavobacteriales; f__Flavobacteriaceae	M	1630	1	22	Uncultured Flavobacteriales bacterium clone S1-5-90	KF786613.1	93.128
OTU_40	k__Bacteria; p__Bacteroidetes; c__Flavobacteriia; o__Flavobacteriales; f__Flavobacteriaceae	M	399	0	2	Aquimarina sp. UA-AR0423 16S ribosomal RNA gene	JX874163.1	98.815
OTU_6	k__Bacteria; p__Bacteroidetes; c__[Saprospirae]; o__[Saprospirales]; f__Saprospiraceae; g__Lewinella	M	1130	0	4	Lewinella antarctica strain NBRC 103142 16S ribosomal RNA gene	NR_114211.1	95.972
OTU_7	k__Bacteria; p__Bacteroidetes; c__[Saprospirae]; o__[Saprospirales]; f__Saprospiraceae; g__Lewinella	M	1239	5	21	Lewinella antarctica strain NBRC 103142 16S ribosomal RNA gene	NR_114211.1	97.156
OTU_24	k__Bacteria; p__Bacteroidetes; c__[Saprospirae]; o__[Saprospirales]; f__Saprospiraceae; g__Lewinella	M	1089	1	5	Lewinella sp. HME9321 16S ribosomal RNA gene	KF385496.1	97.156
OTU_61	k__Bacteria; p__Bacteroidetes; c__[Saprospirae]; o__[Saprospirales]; f__Saprospiraceae; g__Lewinella	M	391	0	3	Uncultured prokaryote clone New.CleanUp.ReferenceOTU197818 16S ribosomal RNA gene	KT977238.1	95.735
OTU_17	k__Bacteria; p__Bacteroidetes; c__Cytophagia; o__Cytophagales; f__Flammeovirgaceae; g__Tunicatimonas; s__pelagia	M	1057	1	6	Uncultured prokaryote clone New.ReferenceOTU920 16S ribosomal RNA gene	KT975351.1	96.919
OTU_10	k__Bacteria; p__Bacteroidetes; c__Cytophagia; o__Cytophagales; f__Flammeovirgaceae; g__Tunicatimonas; s__pelagia	M	869	1	4	Uncultured prokaryote clone 4472709 16S ribosomal RNA gene	KT974036.1	98.812
OTU_75	k__Bacteria; p__Bacteroidetes; c__Cytophagia; o__Cytophagales; f__Flammeovirgaceae; g__Tunicatimonas; s__pelagia	M	448	0	2	Uncultured prokaryote clone New.CleanUp.ReferenceOTU282419 16S ribosomal RNA gene	KT979006.1	96.682
OTU_26	k__Bacteria; p__Bacteroidetes; c__Cytophagia; o__Cytophagales; f__Flammeovirgaceae	M	724	0	4	Uncultured bacterium clone B163 16S ribosomal RNA gene	KJ817628.1	99.287
OTU_20	k__Bacteria; p__Bacteroidetes; c__Cytophagia; o__Cytophagales; f__Flammeovirgaceae	M	586	0	3	Uncultured prokaryote clone New.CleanUp.ReferenceOTU282419	KT979006.1	98.341
OTU_186	k__Bacteria; p__Bacteroidetes; c__Cytophagia; o__Cytophagales; f__Cytophagaceae; g__Persicitalea; s__jodogahamensis	M	402	0	25	Persicitalea jodogahamensis strain NBRC 103568 16S ribosomal RNA gene	NR_114246.1	100
OTU_25	k__Bacteria; p__Bacteroidetes; c__[Rhodothermi]; o__[Rhodothermales]; f__Rhodothermaceae; g__Rubricoccus	M	787	2	6	Uncultured Bacteroidetes bacterium clone 22 16S ribosomal RNA gene	DQ480589.1	99.762
OTU_42	k__Bacteria; p__Bacteroidetes; c__[Rhodothermi]; o__[Rhodothermales]; f__Rhodothermaceae; g__Rubricoccus	M	627	2	6	Uncultured prokaryote clone New.CleanUp.ReferenceOTU97561 16S ribosomal RNA gene	KT981826.1	99.286
OTU_50	k__Bacteria; p__Bacteroidetes; c__[Rhodothermi]; o__[Rhodothermales]; f__Rhodothermaceae; g__Rubricoccus	M	886	0	9	Uncultured prokaryote clone 1093417 16S ribosomal RNA gene	KT972776.1	97.387
OTU_79	k__Bacteria; p__Bacteroidetes; c__[Rhodothermi]; o__[Rhodothermales]; f__Rhodothermaceae; g__Rubricoccus	M	677	1	5	Uncultured prokaryote clone 4442448 16S ribosomal RNA gene	KT973973.1	98.575
OTU_147	k__Bacteria; p__Bacteroidetes; c__[Rhodothermi]; o__[Rhodothermales]; f__Rhodothermaceae; g__Rubricoccus	M	763	1	8	Uncultured prokaryote clone New.CleanUp.ReferenceOTU306719 16S ribosomal RNA gene	KT979468.1	98.333
OTU_250	k__Bacteria; p__Bacteroidetes; c__[Rhodothermi]; o__[Rhodothermales]; f__Rhodothermaceae; g__Rubricoccus	M	902	0	10	Uncultured bacterium clone Mackrl1_6B08 16S ribosomal RNA gene	JQ191752.1	96
OTU_12	k__Bacteria; p__Chloroflexi; c__Chloroflexi; o__[Roseiflexales]	M	876	0	9	Uncultured Chloroflexi bacterium clone HG-B0244 16S ribosomal RNA gene	JN409163.1	90.796
OTU_46	k__Bacteria; p__Chloroflexi; c__Anaerolineae; o__Caldilineales; f__Caldilineaceae	M	446	0	4	Uncultured prokaryote clone New.ReferenceOTU353 16S ribosomal RNA gene	KT974986.1	98.759
OTU_18	k__Bacteria; p__Actinobacteria; c__Nitriliruptoria; o__Euzebyales; f__Euzebyaceae; g__Euzebya	M	841	0	18	Uncultured prokaryote clone 1722070 16S ribosomal RNA gene	KT973006.1	100
OTU_104	k__Bacteria; p__Actinobacteria; c__Acidimicrobiia; o__Acidimicrobiales; f__C111	M	444	35	8	Uncultured actinobacterium clone Shb-BH103 16S ribosomal RNA gene	KJ851406.1	100
OTU_47	k__Bacteria; p__Acidobacteria; c__[Chloracidobacteria]; o__RB41; f__Ellin6075	M	393	0	7	Uncultured bacterium clone LVL1-B11B 16S ribosomal RNA gene	EF464797.1	96.02
OTU_9	k__Bacteria; p__[Thermi]; c__Deinococci; o__Deinococcales; f__Trueperaceae	M	756	0	7	Uncultured prokaryote clone New.CleanUp.ReferenceOTU140479 16S ribosomal RNA gene	KT976147.1	98.5
OTU_76	k__Bacteria; p__[Thermi]; c__Deinococci; o__Deinococcales; f__Trueperaceae	M	396	0	4	Uncultured prokaryote clone 2248445 16S ribosomal RNA gene	KT973114.1	97
OTU_37	k__Bacteria; p__Proteobacteria; c__Alphaproteobacteria; o__Sphingomonadales; f__Sphingomonadaceae; g__Sphingomonas	T	46	9	3488	Sphingomonas sp. TAP1-14_Pa 16S ribosomal RNA gene	KX419227.1	100
OTU_51	k__Bacteria; p__Proteobacteria; c__Alphaproteobacteria; o__Sphingomonadales	T	31	1	303	Uncultured alpha proteobacterium clone SGPZ508 16S ribosomal RNA gene	GQ346899.1	98.507
OTU_59	k__Bacteria; p__Proteobacteria; c__Alphaproteobacteria; o__Sphingomonadales	T	6	0	504	Uncultured alpha proteobacterium clone DOL3 16S ribosomal RNA gene	HM224415.1	100
OTU_16	k__Bacteria; p__Proteobacteria; c__Alphaproteobacteria; o__Rhodospirillales; f__Acetobacteraceae	T	12	0	769	Uncultured bacterium clone nck334a02c1 16S ribosomal RNA gene	KF109662.1	98.756
OTU_34	k__Bacteria; p__Proteobacteria; c__Alphaproteobacteria; o__Rhodospirillales; f__Acetobacteraceae	T	8	0	425	Uncultured bacterium clone ADB-14 16S ribosomal RNA gene	HM366474.1	98.259
OTU_137	k__Bacteria; p__Proteobacteria; c__Alphaproteobacteria; o__Rhodospirillales; f__Acetobacteraceae	T	4	0	332	Uncultured bacterium clone Bas-7-23 16S ribosomal RNA gene	GQ495379.1	98.756
OTU_468	k__Bacteria; p__Proteobacteria; c__Alphaproteobacteria; o__Rhodospirillales; f__Acetobacteraceae	T	0	1	279	Uncultured bacterium clone FL2xc12_18178 16S ribosomal RNA gene	JQ379621.2	99.254
OTU_54	k__Bacteria; p__Proteobacteria; c__Alphaproteobacteria; o__Rhizobiales	T	3	2	630	Methylobacterium sp. G03 79-10 16S ribosomal RNA gene	KF974283.1	100
OTU_165	k__Bacteria; p__Proteobacteria; c__Alphaproteobacteria; o__Rhizobiales; f__Beijerinckiaceae	T	2	1	400	Uncultured bacterium clone YF423 16S ribosomal RNA gene	KF037827.1	100
OTU_44	k__Bacteria; p__Proteobacteria; c__Alphaproteobacteria; o__Rhizobiales; f__Methylobacteriaceae; g__Methylobacterium	T	8	0	296	Methylobacterium phyllosphaerae strain CBMB27, complete genome	CP015367.1	100
OTU_66	k__Bacteria; p__Proteobacteria; c__Alphaproteobacteria; o__Rhizobiales; f__Hyphomicrobiaceae	T	9	7	288	Pseudovibrio sp. AU405_Ted1_MB20 partial 16S rRNA gene, isolate AU405_Ted1_MB20	LN909164.1	100
OTU_95	k__Bacteria; p__Proteobacteria; c__Alphaproteobacteria; o__Rhodobacterales; f__Rhodobacteraceae; g__Rubellimicrobium	T	4	0	342	Uncultured bacterium clone YL1013 16S ribosomal RNA gene	KF037760.1	100
OTU_182	k__Bacteria; p__Proteobacteria; c__Alphaproteobacteria; o__Caulobacterales; f__Caulobacteraceae; g__Mycoplana	T	2	0	302	uncultured bacterium partial 16S rRNA gene, clone AS-10-6	LN929620.1	100
OTU_187	k__Bacteria; p__Proteobacteria; c__Betaproteobacteria; o__Burkholderiales; f__Comamonadaceae; g__Methylibium	T	1	0	309	Uncultured bacterium clone 10A_10-124 16S ribosomal RNA gene	KY190405.1	100
OTU_100	k__Bacteria; p__Proteobacteria; c__Betaproteobacteria; o__Burkholderiales; f__Comamonadaceae; g__Methylibium	T	15	0	266	Uncultured bacterium clone AC301O1e12 16S ribosomal RNA gene	JN672009.1	98.829
OTU_31	k__Bacteria; p__Acidobacteria; c__[Chloracidobacteria]; o__RB41; f__Ellin6075	T	17	0	1368	Uncultured bacterium clone YF205 16S ribosomal RNA gene	KF037780.1	100
OTU_63	k__Bacteria; p__Actinobacteria; c__Actinobacteria; o__Actinomycetales; f__Pseudonocardiaceae; g__Pseudonocardia	T	4	0	833	Uncultured bacterium RNA for 16S rRNA, partial sequence, clone: B0610R001_E15	AB657178.1	98.537
OTU_138	k__Bacteria; p__Actinobacteria; c__Actinobacteria; o__Actinomycetales; f__Pseudonocardiaceae; g__Pseudonocardia	T	7	0	296	Uncultured bacterium clone abscm03.0.119 16S ribosomal RNA gene	JX255256.1	100
OTU_122	k__Bacteria; p__Actinobacteria; c__Actinobacteria; o__Actinomycetales; f__Micromonosporaceae	T	3	0	320	Uncultured actinobacterium clone WoA_E06 16S ribosomal RNA gene	FJ661952.1	100
OTU_22	k__Bacteria; p__Bacteroidetes; c__Cytophagia; o__Cytophagales; f__Cytophagaceae; g__Spirosoma	T	2	0	541	Huanghella arctica strain R9-9 16S ribosomal RNA, partial sequence	NR_132334.1	94.55
OTU_112	k__Bacteria; p__Bacteroidetes; c__Cytophagia; o__Cytophagales; f__Cytophagaceae; g__Spirosoma	T	2	0	276	Uncultured bacterium clone abscm03.0.123 16S ribosomal RNA gene	JX255266.1	95.508
OTU_174	k__Bacteria; p__Bacteroidetes; c__Cytophagia; o__Cytophagales; f__Cytophagaceae; g__Spirosoma	T	1	0	267	Uncultured Spirosoma sp. partial 16S rRNA gene, clone3B_03	HE860930.1	93.602
OTU_23	k__Bacteria; p__Bacteroidetes; c__Cytophagia; o__Cytophagales; f__Cytophagaceae; g__Hymenobacter	T	5	0	456	Uncultured bacterium clone ncd2611b05c1 16S ribosomal RNA gene	JF228415.1	96.919
OTU_29	k__Bacteria; p__Bacteroidetes; c__Cytophagia; o__Cytophagales; f__Cytophagaceae; g__Hymenobacter	T	3	0	409	Uncultured bacterium clone ncd1974d12c1 16S ribosomal RNA gene	JF171999.1	95.249
OTU_130	k__Bacteria; p__Bacteroidetes; c__[Saprospirae]; o__[Saprospirales]; f__Chitinophagaceae; g__Flavisolibacter	T	1	0	409	Uncultured Flavobacteria bacterium clone AUVE_11A06 16S ribosomal RNA gene	JN830995.1	99.762
OTU_235	k__Bacteria; p__Bacteroidetes; c__[Saprospirae]; o__[Saprospirales]; f__Chitinophagaceae	T	3	0	444	Uncultured Bacteroidetes bacterium clone C_25 16S ribosomal RNA gene	FJ490262.1	100
OTU_39	k__Bacteria; p__Bacteroidetes; c__[Saprospirae]; o__[Saprospirales]; f__Chitinophagaceae	T	1	0	389	Uncultured Sphingobacteria bacterium clone GSY-XJ86 16S ribosomal RNA gene	JN225522.1	95.991
OTU_77	k__Bacteria; p__Bacteroidetes; c__[Saprospirae]; o__[Saprospirales]; f__Chitinophagaceae	T	2	0	372	Uncultured bacterium clone W033h2_12985 16S ribosomal RNA gene	JQ371428.2	98.341
OTU_32	k__Bacteria; p__FBP	T	108	1	368	Uncultured bacterium clone ncd560a05c1 16S ribosomal RNA gene	HM274527.1	100
OTU_28	k__Bacteria; p__Armatimonadetes; c__[Fimbriimonadia]; o__[Fimbriimonadales]; f__[Fimbriimonadaceae]; g__Fimbriimonas	T	2	1	330	Uncultured bacterium clone Bact_SIP_119 16S ribosomal RNA gene	JX204334.1	99.256
